# Supplementary material for: High frequency of CRB1 mutations as cause of Early-Onset Retinal Dystrophies in the Spanish population
Source: PubMed Central journal article supplement (PMC3637806; doi:10.1186/1750-1172-8-20), 2013-02-05
Supplement: 1750-1172-8-20-S2.pdf [file 1750-1172-8-20-S2.pdf]

## Normalized Melting Curves

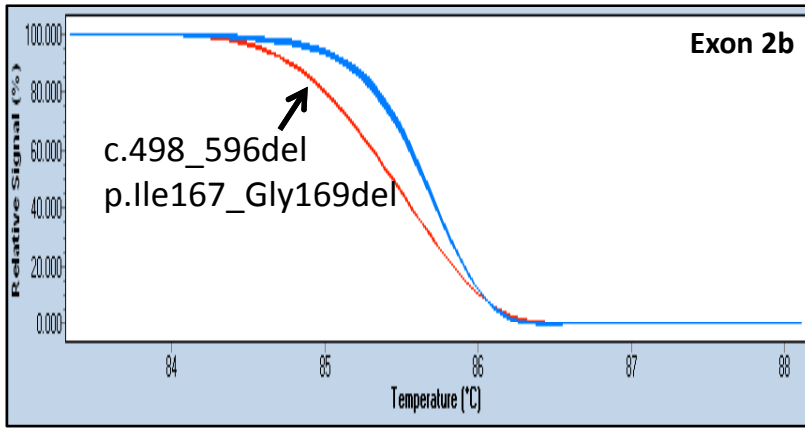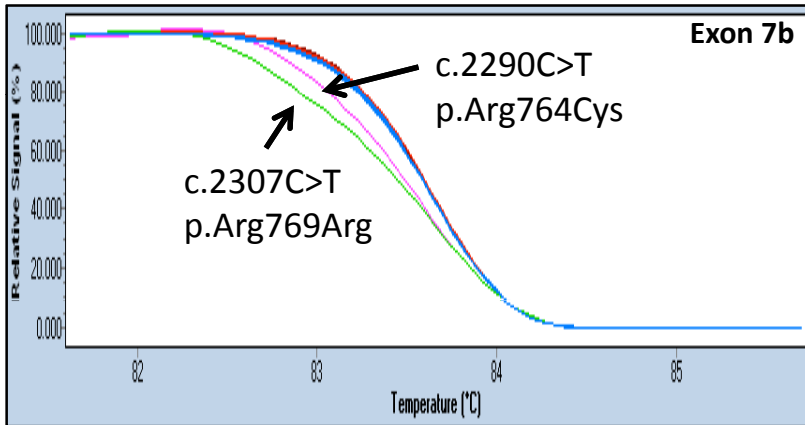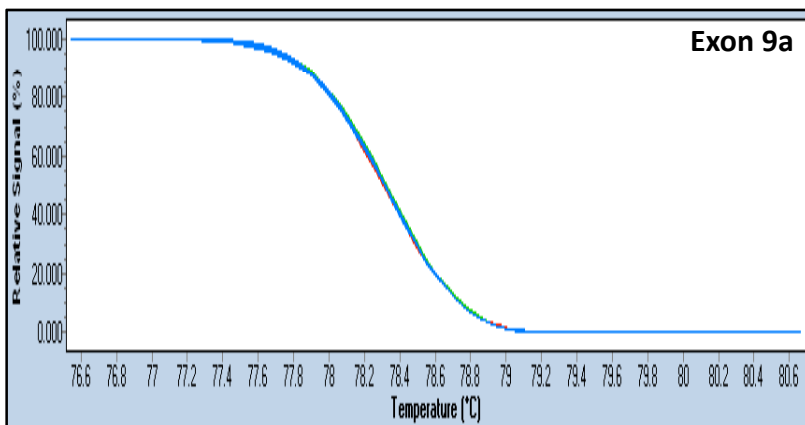

## Difference Plots

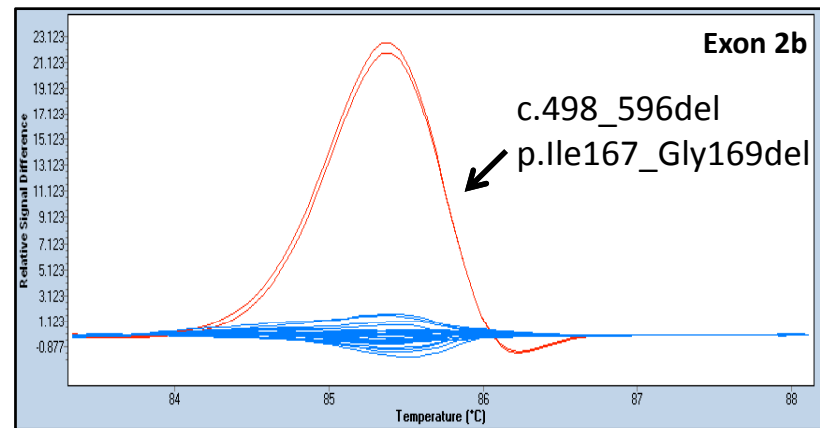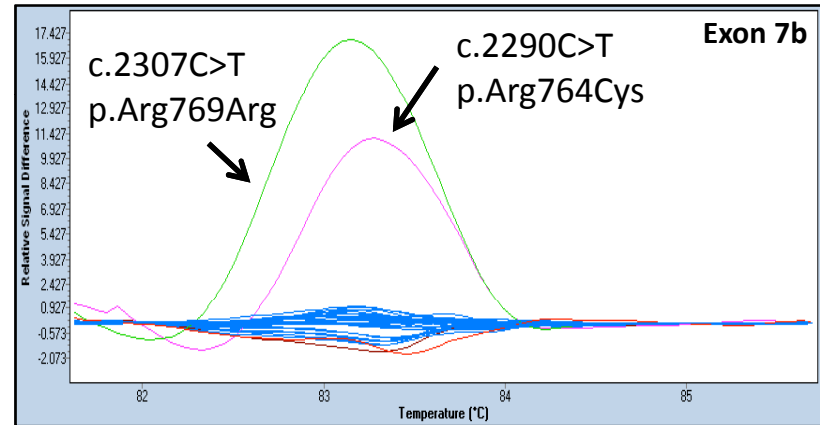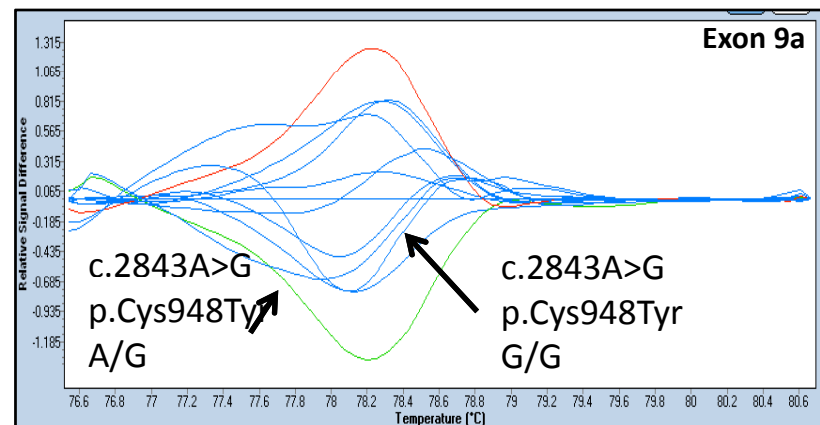

**LCA-0004**  
 m1: *CRB1* p.Cys896\*  
 m2: *CRB1* p.Cys948Tyr

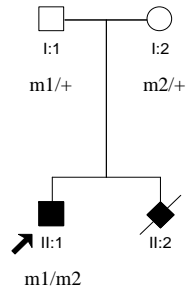

**LCA-0010**  
 m: *CRB1* p.Ala161Glyfs\*8

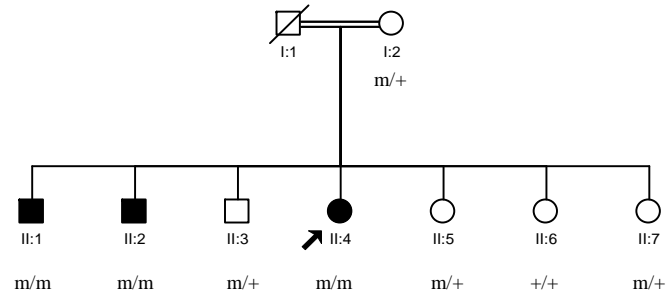

**LCA-0011**  
 m1: *CRB1* p.Ser749del  
 m2: *CRB1* p.Cys948Tyr

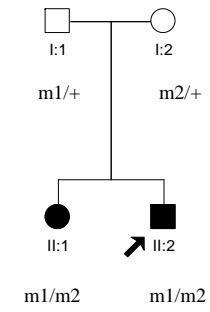

**LCA-0017**  
 m: *CRB1* p.Lys801\*

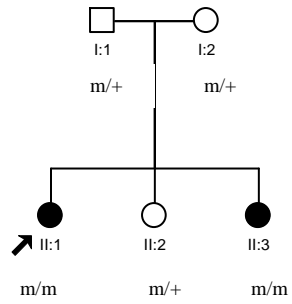

**LCA-0019**  
 m1: *CRB1* p.Ile205Aspfs\*13  
 m2: *CRB1* p.Val743Serfs\*11

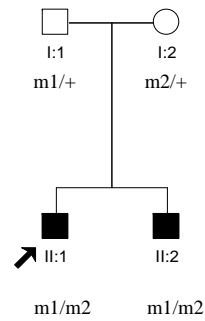

**LCA-0027**  
 m1: *CRB1* p.Cys948Tyr  
 m2: *CRB1* p.Glu1330\*

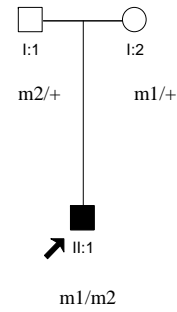

**LCA-0028**  
 m1: *CRB1* p.Cys948Tyr  
 m2: *CRB1* p.Ile1100Thr

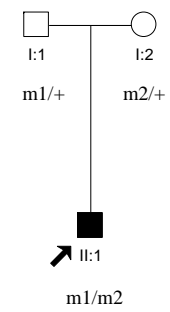

Supplemental Figure S2.

**LCA-0032**  
 m1: *CRB1* p.Leu535Pro  
 m2: *CRB1* p.Cys948Tyr

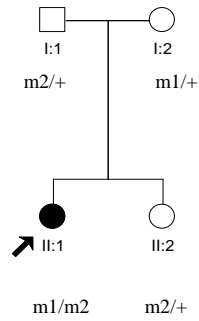

**LCA-0050**  
 m: *CRB1* p.Cys948Tyr

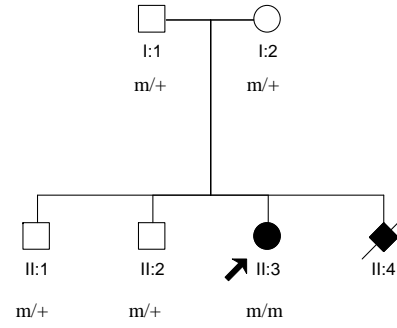

**LCA-0051**  
 m1: *CRB1* p.Ile205Aspfs\*13  
 m2: *CRB1* p.Cys948Tyr

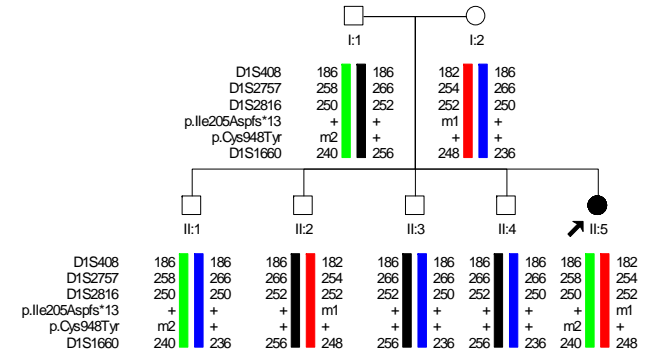

**LCA-0060**  
 m1: *CRB1* p.Gly770Val  
 m2: *CRB1* p.His935Glnfs\*13

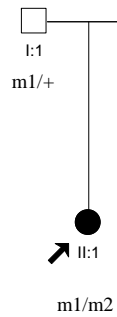

**LCA-0063**  
 m1: *CRB1* p.Ile205Aspfs\*13  
 m2: c.4005+1G>A

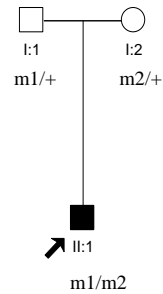

**LCA-0099**  
 m1: *CRB1* p.Asp564Tyr  
 m2: *CRB1* p.Cys896\*

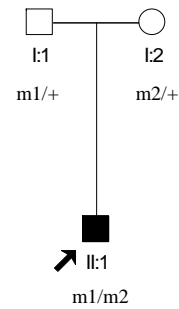

**LCA-0101**  
 m1: *CRB1* p.Tyr1051\*  
 m2: *CRB1* p.Val1334Trpfs\*

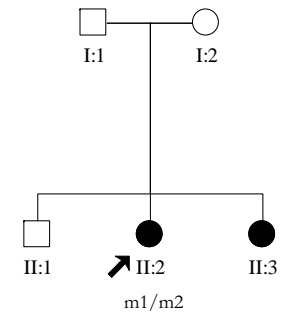

Supplemental Figure S2 (Continued).

**RP-0025**  
m: *CRB1* p.Ile1100Thr

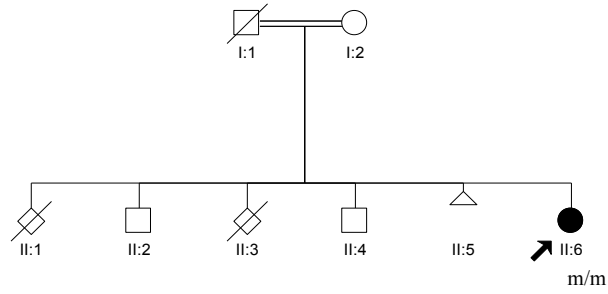

**RP-0091**  
m1: *CRB1* p.Ala161Glyfs\*8

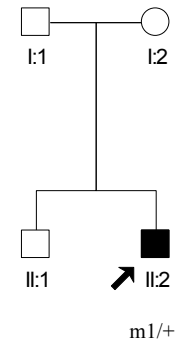

**MD-0092**  
m1: *CRB1* p.Ile167\_Gly169del  
m2: *CRB1* p.Cys948Tyr

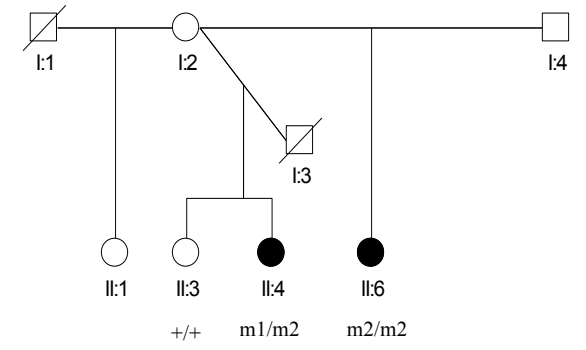

**RP-0280 &**  
m1: *CRB1* p.Trp822\*  
m2: *CRB1* p.Cys948Tyr

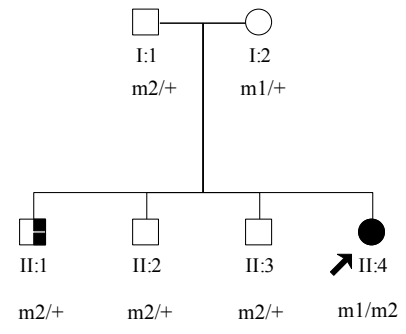

**MD-0351**  
m1: *CRB1* p.Cys948Tyr  
m2: *CRB1* p.Met1053Val

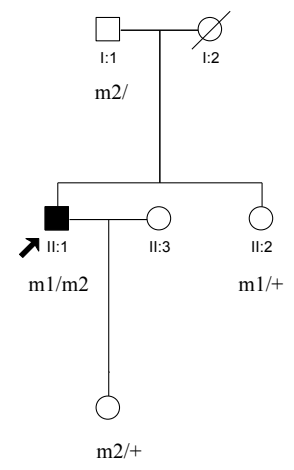

**RP-0487**  
m1: *CRB1* p.Arg764Cys  
m2: *CRB1* p.Glu1330\*

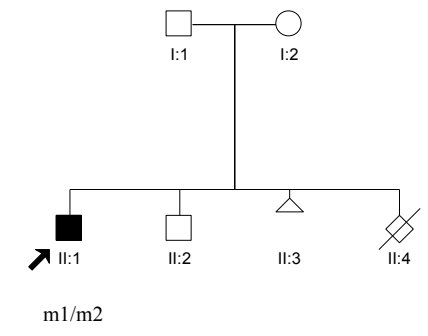

Supp Figure S3.

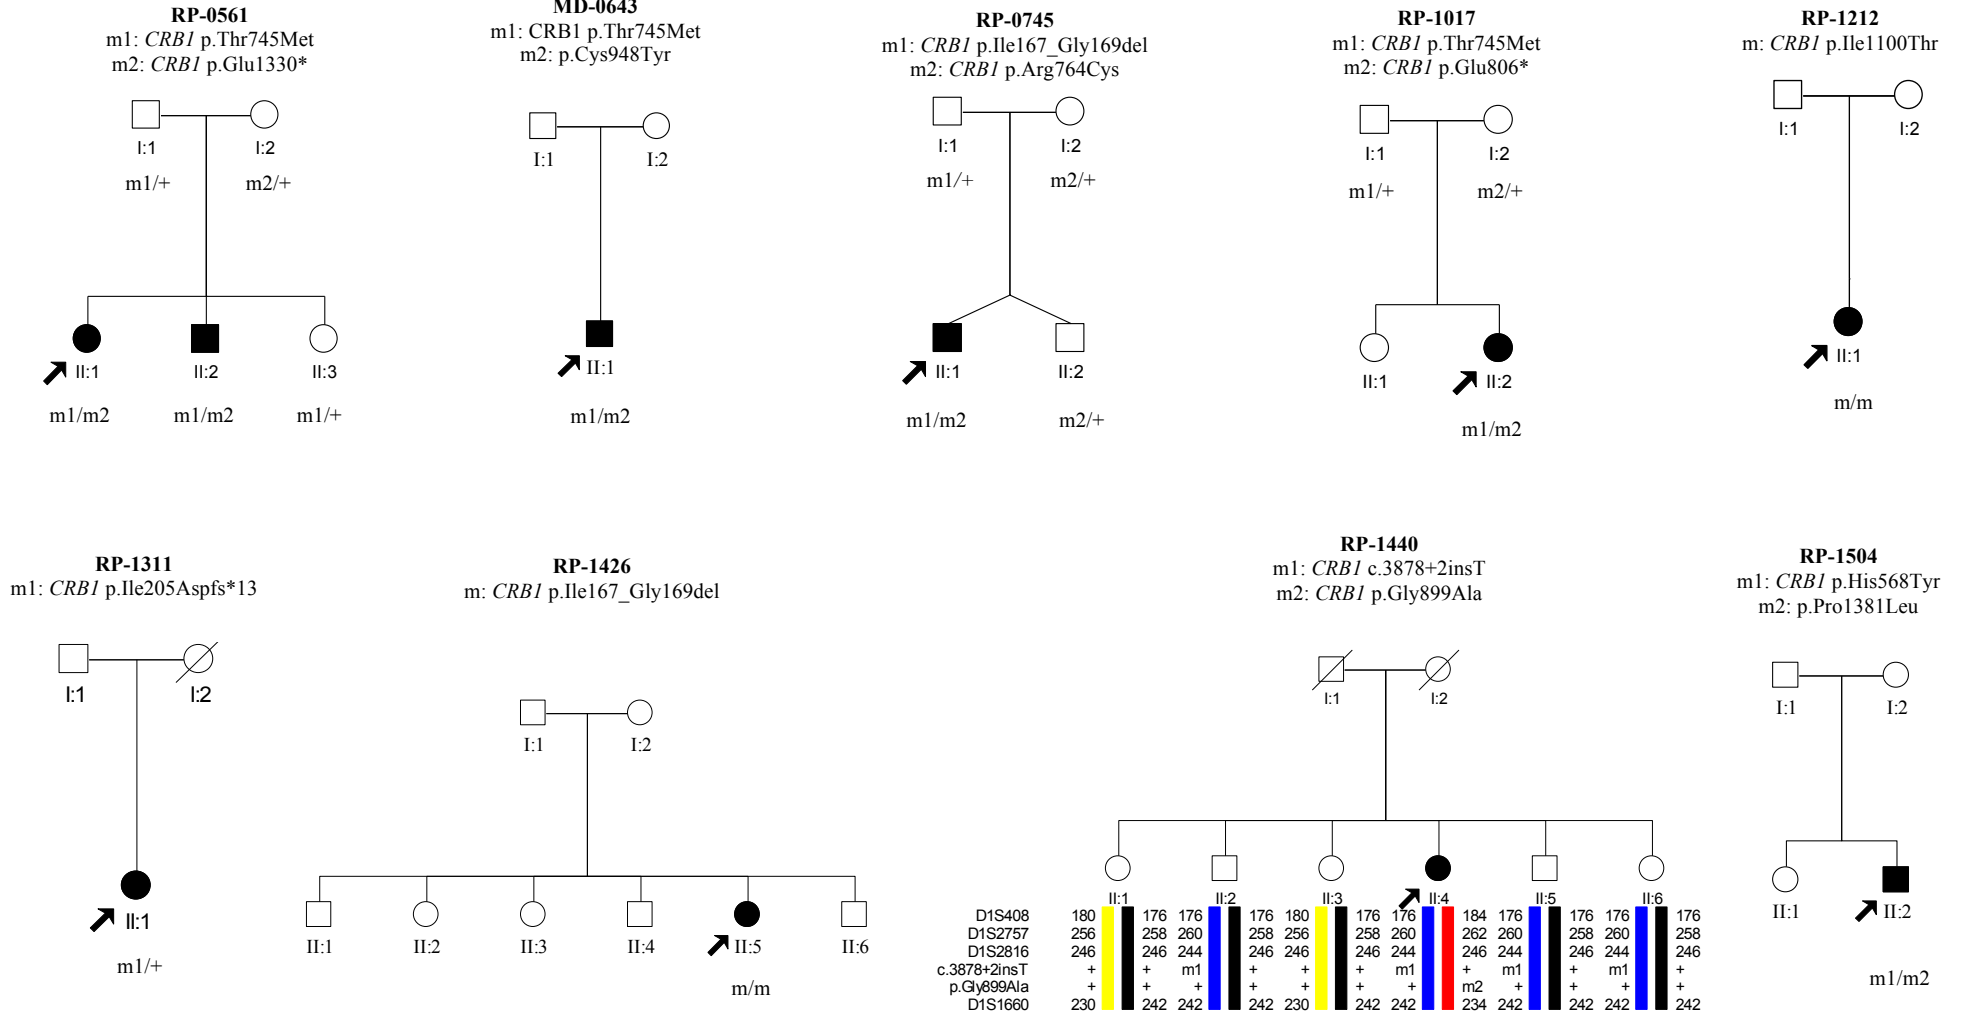

Supp Figure S3. (Continued).

**RP-1535**  
 m1: *CRB1* p.Asp564Tyr  
 m2: *CRB1* p.Asp1005Val

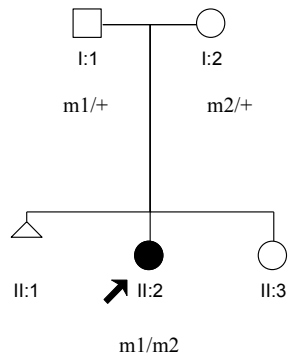

**RP-1558**  
 m1: *CRB1* p.Cys948Tyr  
 m2: *CRB1* p.Glu1203\*

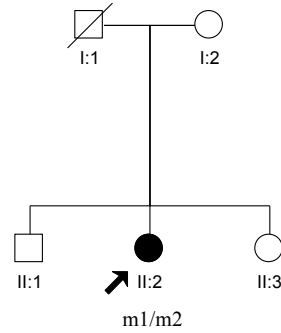

**RP-1586**  
 m: *CRB1* p.Thr745Met

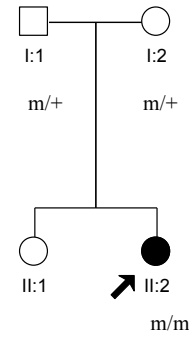

**RP-1611**  
 m1: *CRB1* p.Ile167\_Gly169del  
 m2: *CRB1* p.C383Sfs\*66

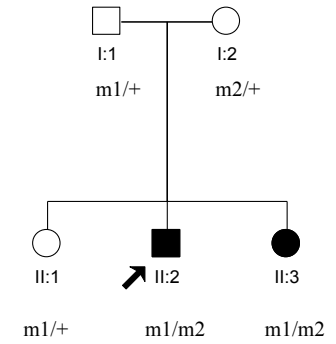

**RP-1615**  
 m1: *CRB1* p.Ile1100Thr  
 m2: c.3749+1 3749+2delGT

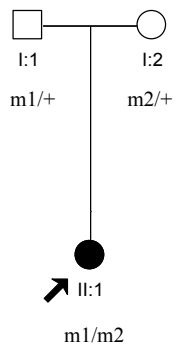

**RP-1625**  
 m1: *CRB1* p.Cys948Tyr  
 m2: *CRB1* p.Met1053Val

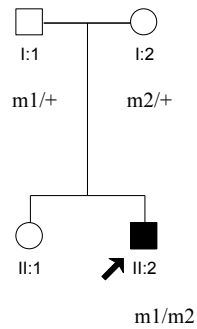

**RP-1689**  
 m1: *CRB1* p.Arg764His  
 m2: p.Arg1390\*

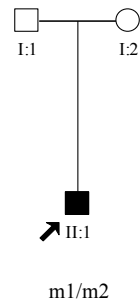

**RP-1779**  
 m1: *CRB1* p.Arg764Cys  
 m2: *CRB1* p.Ile1100Thr

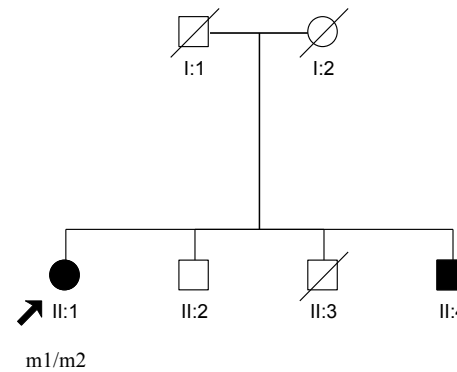

**RP-2004**  
 m1: *CRB1* p.Ile167\_Gly169del  
 m2: p.Thr745Met

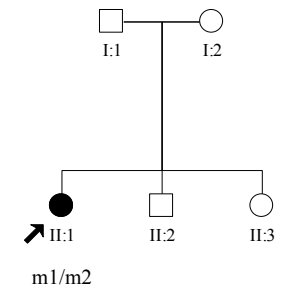

Supp Figure S3. (Continued).

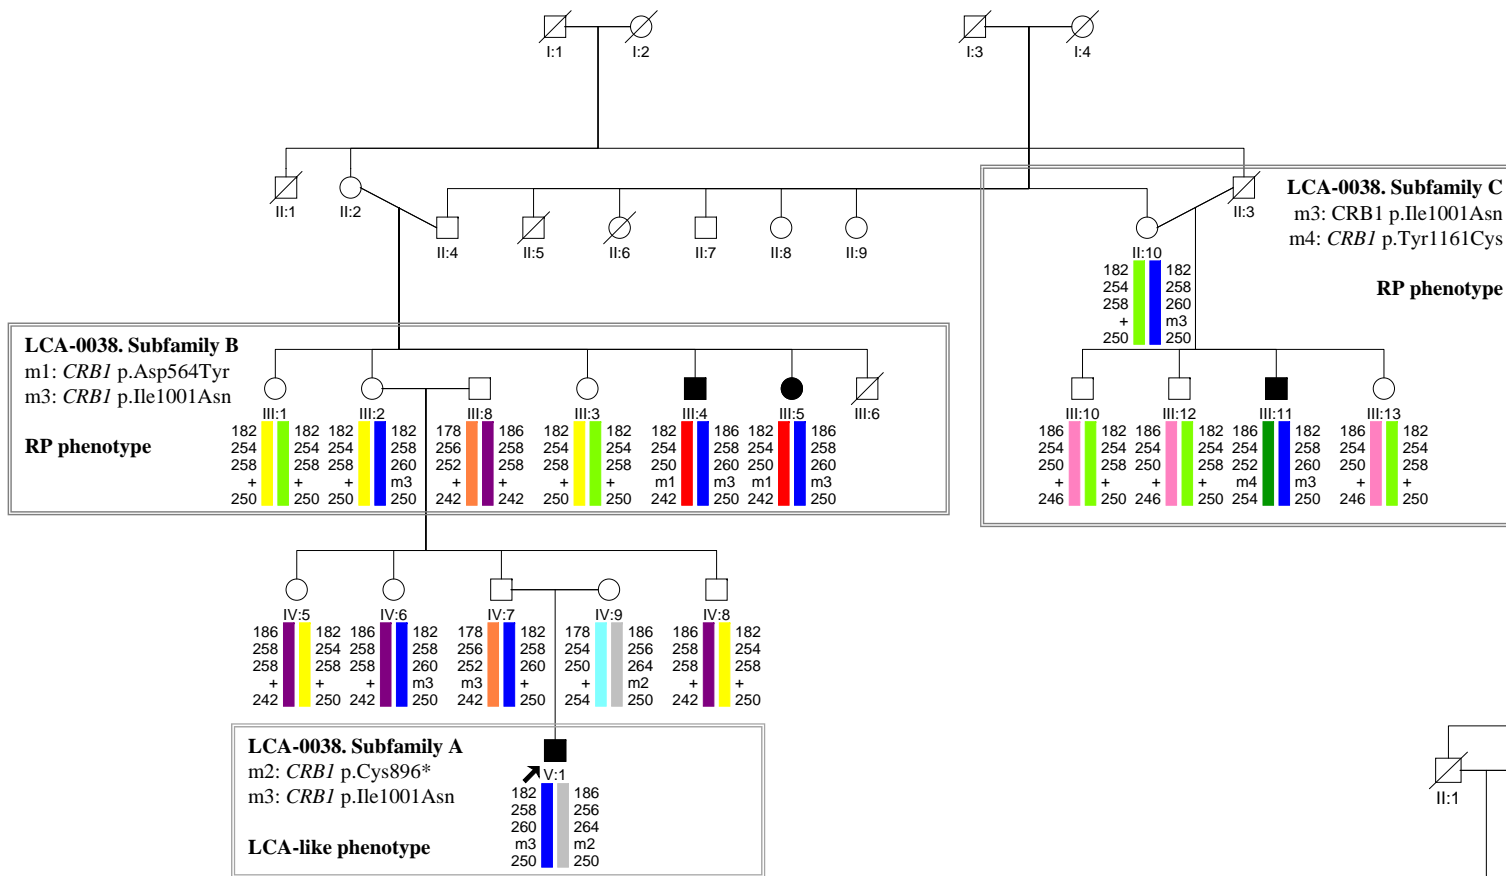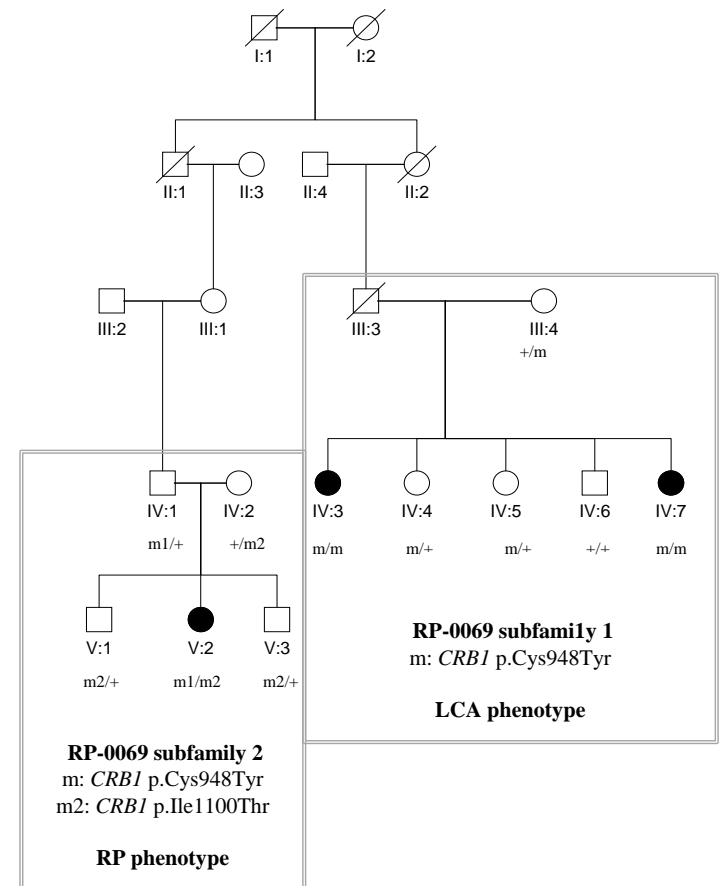

Supp Figure S4

**p.Leu535Pro****p.Asp564Tyr****p.His568Tyr****Leu599Pro****p.Arg764His****p.Gly770Val****p.Gly899Ala**

|                               |         |
|-------------------------------|---------|
| <i>Homo sapiens</i>           | FVKLELL |
| <i>Pan troglodytes</i>        | FVKLELL |
| <i>Callithrix jacchus</i>     | FLKLELL |
| <i>Macaca mulatta</i>         | FVKLELL |
| <i>Pongo abelli</i>           | FVKLELL |
| <i>Nomascus leucogenys</i>    | FVKLELL |
| <i>Bos taurus</i>             | FVMLEVL |
| <i>Rattus norvegicus</i>      | SVKLELL |
| <i>Mus musculus</i>           | SMKLELL |
| <i>Oryctolagus cuniculus</i>  | FVKLALL |
| <i>Canis lupus_familiaris</i> | FIMLELF |
| <i>Equus caballus</i>         | FVMLELL |
| <i>Sus scrofa</i>             | FLALELL |
| <i>Monodelphis domestica</i>  | HVKLELV |
| <i>Meleagris gallopavo</i>    | FVKLELL |
| <i>Anolis carolinensis</i>    | FVKLEIL |
| <i>Xenopus tropicalis</i>     | SVRLYLQ |
| <i>Danio rerio</i>            | TLSEIQ  |

|              |
|--------------|
| TSDGEWHF     |
| TSDGEWHF     |
| TSDGEWHF     |
| TSDGEWHF     |
| TSDGEWHF     |
| TSDGEWHF     |
| TSDG G W H A |
| TSDGEWHL     |
| TSDGEWHF     |
| TSDGEVHP     |
| TSDGAVHS     |
| TSDGEVHS     |
| ASDGEVHS     |
| VSDGEVHS     |
| VSDGEVHS     |
| VSDGEVHL     |
| VSDDRVHA     |
| VSDGEVHT     |

|               |
|---------------|
| PTFLESD       |
| PSFLESD       |
| ASFESD        |
| PSFLESD       |
| PSFLESD       |
| PSFLESD       |
| PSFESD        |
| SVS I E N H   |
| SVR V E N H   |
| PSF F L S H   |
| PSF F E S H   |
| PSF F G K D   |
| PSF F G S D   |
| PSF I E R D   |
| S A M I D N D |
| E T R I D C Q |
| D H I I S T H |
| Q V K I G A L |

|         |
|---------|
| YI RVWL |
| YI RVWL |
| YI RVWL |
| YI RVWL |
| YI RVWL |
| YI RVWL |
| YI RVWL |
| YV CVWL |
| YV SVWL |
| YI RVWL |
| YI CVWL |
| FI RVWL |
| YV RVWL |
| YL SVWL |
| HV RVYL |
| FL KVWL |
| HS VISL |
| YL QMWL |

|             |
|-------------|
| VWL ERGRLAM |
| VWL ERGRLAM |
| VWL EHGRLVM |
| VWL EHGRLAM |
| VWL EHGRLAM |
| VWL EHGRLAM |
| VWL EHGRLAM |
| VWL EHGSLAL |
| VWL EHGSLAL |
| VWL EHGRLAM |
| VWL EHGRLAM |
| VWL EHGRLAM |
| VWL ERGRLAM |
| VWL EHGRLAV |
| VYLEEGKLTMT |
| VWLEEGKLVL  |
| ISLDGGIVTM  |
| MWLEKGLTV   |

|                     |
|---------------------|
| PCHNGGVCHS          |
| PCHNGGVCHS          |
| PCHNGGVCHS          |
| PCRNGGVCHS          |
| PCHNGGVCHS          |
| PCHNGGVCHS          |
| PCHNGGVCHS          |
| PCHHG G I C Y P     |
| PCHNGGVCHS          |
| PCHNGGVCHS          |
| PCHNGGVCHS          |
| PCHNGGVCHS          |
| PCHNGGVCHS          |
| S - - N L G A A V S |
| PCHNGGVCHS          |
| PCHNGGVCHS          |
| PCHNGGVCHS          |
| PCKNSGVCHS          |
| TCHNGGVCHS          |
| PCQNGGVCHS          |

**Ala872Thr****p.Ile1001Asn****p.Asp1005Val****p.Met1053Va****p.Ile1100Thr****p.Tyr1161Cys**

|                               |         |
|-------------------------------|---------|
| <i>Homo sapiens</i>           | TNNASL  |
| <i>Pan troglodytes</i>        | TNNASL  |
| <i>Callithrix jacchus</i>     | TNEALL  |
| <i>Macaca mulatta</i>         | TNNVSL  |
| <i>Pongo abelli</i>           | TNDASL  |
| <i>Nomascus leucogenys</i>    | TNDASL  |
| <i>Bos taurus</i>             | TSSAAH  |
| <i>Rattus norvegicus</i>      | TNSAQH  |
| <i>Mus musculus</i>           | TNNAYD  |
| <i>Oryctolagus cuniculus</i>  | MNNTSR  |
| <i>Canis lupus_familiaris</i> | ISNASH  |
| <i>Equus caballus</i>         | TSNSSR  |
| <i>Sus scrofa</i>             | TSRAAH  |
| <i>Monodelphis domestica</i>  | KGNSTL  |
| <i>Meleagris gallopavo</i>    | LNSFI - |
| <i>Anolis carolinensis</i>    | MNSVIS  |
| <i>Xenopus tropicalis</i>     | ESSTVG  |
| <i>Danio rerio</i>            | SANSYK  |

|           |
|-----------|
| LNISIQDS  |
| LNISIQDS  |
| LNISIQDS  |
| LNISIQDS  |
| LNISIQDS  |
| LNISIQDS  |
| LRIHIQDS  |
| LNISIQDS  |
| LNISIQDA  |
| LNVISIQDS |
| LNISIRDS  |
| LSISIRDS  |
| LHVSIRE   |
| ITISIQNS  |
| VISISIHNS |
| ISISIQKT  |
| LTIAIQRS  |
| VTVSLQDG  |

|                     |
|---------------------|
| SRWGM EVDNE         |
| SRWGM EVDNE         |
| SRWGM EVDNQ         |
| SRWGM EVDNQ         |
| SRWGM EVDNQ         |
| SRWGM EVDNQ         |
| SRWGM EVDGQ         |
| S L W G M E V D D Q |
| SRWGM EVDNQ         |
| SRWHMEVDNQ          |
| SRWGM EVDNQ         |
| SRWGM EVDNQ         |
| SRWGM EVDHP         |
| SRWFM EVD D Q       |
| SKWHMNI DNK         |
| STWFM DL D G E      |
| SHWGM AL D G K      |
| SHWIM PL D E K      |

|            |
|------------|
| CLSTIEIGGI |
| CLSTIEIGGI |
| CLSTIEIGGI |
| CLSTIEIGGI |
| CLSTIEIGGI |
| CLSTIEIGGI |
| CLSTIAISGL |
| CLSTVQIGGL |
| CLSTIEIGGI |
| CLSTIEIGGI |
| CLSTIEIGGI |
| CLSTIEIGGI |
| CLSTIEIGGI |
| CLSTIEIGGI |
| CLSTIEIGGI |
| CLSTIEIGGI |
| CLSTIEIGGI |
| CLSTIEIGGI |
| CLSNVEIGGI |

|             |
|-------------|
| IYSSYHCSCP  |
| IYSSYHCSCP  |
| IYSSYHCSCP  |
| IYSSYHCSCP  |
| IYSSYHCSCP  |
| IYSSYHCSCP  |
| IYSSYHCSCP  |
| TYSSHRCCTCP |
| SYSSYRCACL  |
| SYSSYRCACL  |
| VYYSYHCYCP  |
| IYSSYHCSCP  |
| IYSSYHCSCP  |
| MYRSYHCTCP  |
| FYNSYGCVCP  |
| LYTSYRCMCP  |
| FYTHYHCKCA  |
| GFTHP ICTCP |
| HFNLEHCFCL  |



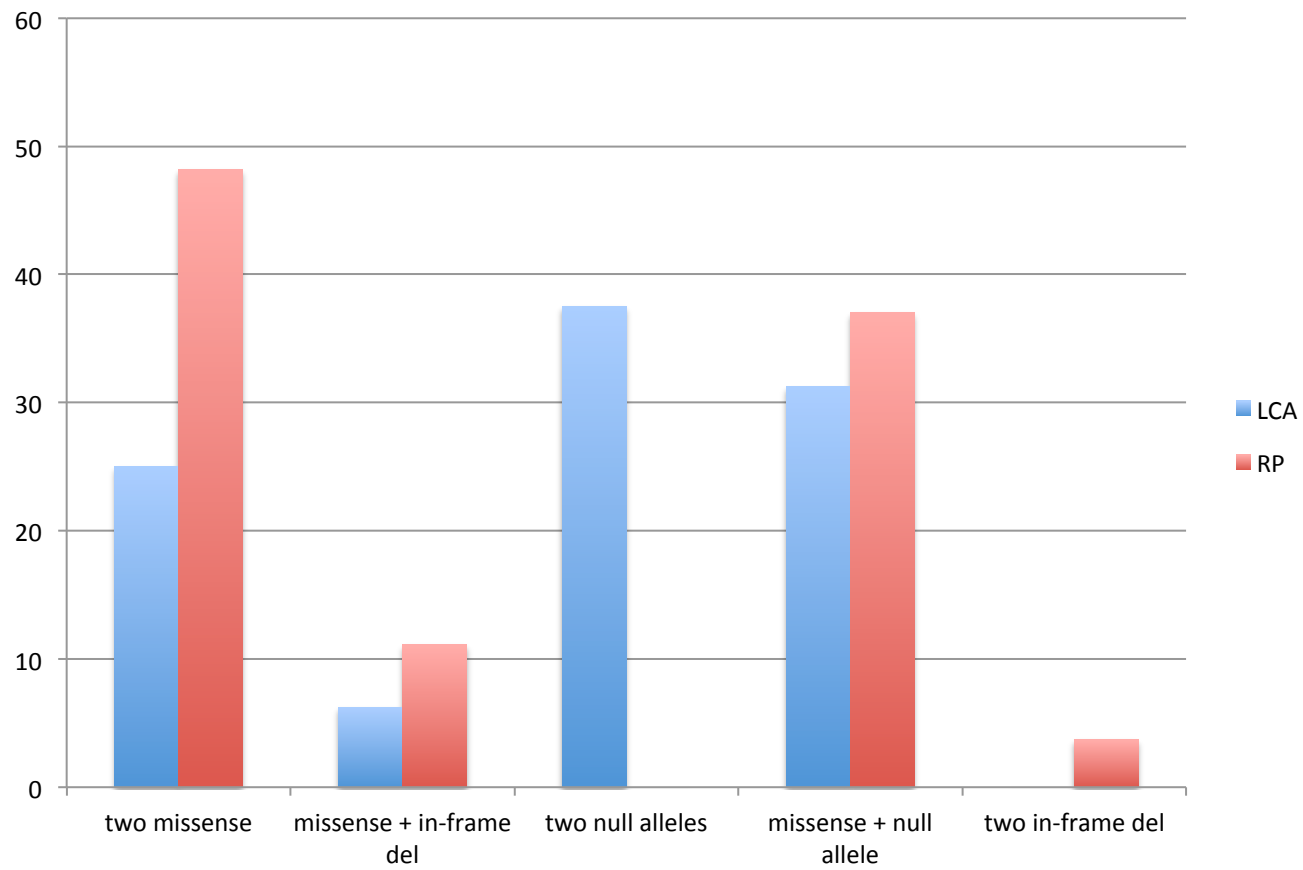

Suppl Figure S6
